# Supplementary material
Source: ML conference proceedings conference paper supplement (https://openreview.net/forum?id=tacb2bFZcm)
Supplement: supplementary_material [file attachment]

# Supplementary Material:

## UPS: Unified Projection Sharing for Lightweight Single-Image Super-resolution and Beyond

Anonymous Author(s)

### 1 Quantitative Comparison with More Methods.

In Table 1 and Table 2, we present additional lightweight SISR models for comparison. It is evident that UPS demonstrates state-of-the-art performance across various public benchmarks and settings. Furthermore, UPS-S, which is even more lightweight, achieves comparable results compared to other methods. Particularly noteworthy is the substantial performance improvement of UPS-S over our baseline model (SwinIR-S [1]), thereby validating the efficacy of our proposed unified projection-sharing strategy.

Table 1: Quantitative results of SOTA lightweight SISR methods ( $\times 2$ ).

| Method ( $\times 2$ ) | Venue     | Set5<br>PSNR/SSIM | Set14<br>PSNR/SSIM | BSD100<br>PSNR/SSIM | Urban100<br>PSNR/SSIM | Manga109<br>PSNR/SSIM |
|-----------------------|-----------|-------------------|--------------------|---------------------|-----------------------|-----------------------|
| SRCNN [2]             | ECCV14    | 36.66/0.9542      | 32.42/0.9063       | 31.36/0.8878        | 29.50/0.8946          | 35.74/0.9661          |
| VDSR [3]              | CVPR16    | 36.53/0.9587      | 33.03/0.9124       | 31.90/0.8960        | 30.76/0.9140          | 37.22/0.9750          |
| MemNet [4]            | ICCV17    | 37.78/0.9597      | 33.28/0.9142       | 32.08/0.8978        | 31.31/0.9195          | 37.72/0.9740          |
| SRMDNF [5]            | CVPR18    | 37.79/0.960       | 33.32/0.915        | 32.05/0.8985        | 31.33/0.9204          | 38.07/0.9761          |
| CARN [6]              | ECCV18    | 37.76/0.9590      | 33.52/0.9166       | 32.09/0.8978        | 31.92/0.9256          | 38.36/0.9765          |
| SRFBN-S [7]           | CVPR19    | 37.78/0.9597      | 33.35/0.9156       | 32.00/0.8970        | 31.41/0.9207          | 38.06/0.9757          |
| IMDN [8]              | MM19      | 38.00/0.9605      | 33.63/0.9177       | 32.19/0.8996        | 32.17/0.9283          | 38.88/0.9774          |
| RFDN-L [9]            | ECCV20    | 38.08/0.9606      | 33.67/0.9190       | 32.18/0.8996        | 32.24/0.9290          | 38.95/0.9773          |
| MAFFSRN [10]          | ECCV20    | 37.97/0.9603      | 33.49/0.9170       | 32.14/0.8994        | 31.96/0.9268          | -/-                   |
| LatticeNet [11]       | ECCV20    | 38.15/0.9610      | 33.78/0.9193       | 32.25/0.9005        | 32.43/0.9302          | -/-                   |
| LAPAR-A [12]          | NeurIPS20 | 38.01/0.9605      | 33.62/0.9183       | 32.19/0.8999        | 32.10/0.9283          | 38.67/0.9772          |
| RLFN [13]             | CVPRW22   | 38.07/0.9607      | 33.72/0.9187       | 32.22/0.9000        | 32.33/0.9299          | -/-                   |
| SwinIR-light [14]     | ICCVW21   | 38.14/0.9611      | 33.86/0.9206       | 32.31/0.9012        | 32.76/0.9340          | 39.12/0.9783          |
| NGswin [15]           | CVPR23    | 38.05/0.9610      | 33.79/0.9199       | 32.27/0.9008        | 32.53/0.9324          | 38.97/0.9777          |
| SwinIR-NG [15]        | CVPR23    | 38.17/0.9612      | 33.94/0.9205       | 32.31/0.9013        | 32.78/0.9340          | 39.20/0.9781          |
| DLGSA-I [16]          | ICCV23    | 38.20/0.9612      | 33.89/0.9203       | 32.30/0.9012        | 32.94/0.9355          | 39.29/0.9780          |
| UPS (Ours)            | —         | 38.26/0.9642      | 34.16/0.9232       | 32.42/0.9031        | 33.08/0.9373          | 39.62/0.9800          |
| SwinIR-S [14]         | ICCVW21   | 38.06/0.9603      | 33.80/0.9186       | 32.23/0.9006        | 32.24/0.9301          | 38.76/0.9778          |
| UPS-S (Ours)          | —         | 38.16/0.9638      | 34.00/0.9220       | 32.36/0.9023        | 32.79/0.9346          | 39.26/0.9790          |

### 2 More Qualitative Results

We provide additional visual examples in Fig. 1 and Fig. 2 for several widely used benchmarks, including Set14 [19], BSD100 [20], DIV2K [21], Manga109 [22]. Compared with SOTA SISR methods, i.e., LAPAR-A [12], SwinIR-light [1], NGswin [15], UPS reconstructs clearer image textures and fewer artifacts, demonstrating its effectiveness of similarity modeling.

Table 2: Quantitative results of SOTA lightweight SISR methods ( $\times 3$ ,  $\times 4$ ).

| Method ( $\times 3$ ) | Venue     | Set5<br>PSNR/SSIM | Set14<br>PSNR/SSIM | BSD100<br>PSNR/SSIM | Urban100<br>PSNR/SSIM | Manga109<br>PSNR/SSIM |
|-----------------------|-----------|-------------------|--------------------|---------------------|-----------------------|-----------------------|
| SRCNN [2]             | ECCV14    | 32.75/0.9090      | 29.28/0.8209       | 28.41/0.7863        | 26.24/0.7989          | 30.59/0.9107          |
| VDSR [3]              | CVPR16    | 33.66/0.9213      | 29.77/0.8314       | 28.82/0.7976        | 27.14/0.8279          | 32.01/0.9340          |
| MemNet [4]            | ICCV17    | 34.09/0.9248      | 30.00/0.8350       | 28.96/0.8001        | 27.56/0.8376          | 32.51/0.9369          |
| EDSR [17]             | CVPRW17   | 34.37/0.9270      | 30.28/0.8417       | 29.09/0.8052        | 28.15/0.8527          | 33.45/0.9439          |
| SRMDNF [5]            | CVPR18    | 34.12/0.9254      | 30.04/0.8382       | 28.97/0.8025        | 27.57/0.8398          | 33.00/0.9403          |
| CARN [6]              | ECCV18    | 34.29/0.9255      | 30.29/0.8407       | 29.06/0.8034        | 28.06/0.8493          | 33.50/0.9440          |
| IMDN [8]              | MM19      | 34.36/0.9270      | 30.32/0.8417       | 29.09/0.8046        | 28.17/0.8519          | 33.61/0.9445          |
| SRFBN-S [7]           | CVPR19    | 34.20/0.9255      | 30.10/0.8372       | 28.96/0.8010        | 27.66/0.8415          | 33.02/0.9404          |
| RFDN-L [9]            | ECCV20    | 34.47/0.9280      | 30.35/0.8421       | 29.11/0.8053        | 28.32/0.8547          | 33.78/0.9458          |
| MAFFSRN [10]          | ECCV20    | 34.45/0.9277      | 30.40/0.8432       | 29.13/0.8061        | 28.26/0.8552          | -/-                   |
| LatticeNet [11]       | ECCV20    | 34.53/0.9281      | 30.39/0.8424       | 29.15/0.8059        | 28.33/0.8538          | -/-                   |
| LAPAR-A [12]          | NeurIPS20 | 34.36/0.9267      | 30.34/0.8421       | 29.11/0.8054        | 28.15/0.8523          | 33.51/0.9441          |
| ESRT [14]             | CVPRW22   | 34.42/0.9268      | 30.43/0.8433       | 29.15/0.8063        | 28.46/0.8574          | 33.95/0.9455          |
| SwinIR-light [14]     | ICCVW21   | 34.62/0.9289      | 30.54/0.8463       | 29.20/0.8082        | 28.66/0.8624          | 33.98/0.9478          |
| NGswin [15]           | CVPR23    | 34.52/0.9282      | 30.53/0.8456       | 29.19/0.8078        | 28.52/0.8603          | 33.89/0.9470          |
| SwinIR-NG [15]        | CVPR23    | 34.64/0.9293      | 30.58/0.8471       | 29.24/0.8090        | 28.75/0.8639          | 34.22/0.9488          |
| DLGSA-I [16]          | ICCV23    | 34.70/0.9295      | 30.58/0.8465       | 29.24/0.8089        | 28.83/0.8653          | 34.16/0.9483          |
| UPS (Ours)            | —         | 34.66/0.9322      | 30.72/0.8489       | 29.31/0.8114        | 28.98/0.8685          | 34.53/0.9505          |
| SwinIR-S [14]         | ICCVW21   | 34.38/0.9281      | 30.46/0.8448       | 29.15/0.8073        | 28.37/0.8572          | 33.77/0.9464          |
| UPS-S (Ours)          | —         | 34.53/0.9312      | 30.55/0.8463       | 29.24/0.8093        | 28.60/0.8614          | 34.12/0.9484          |
| Method ( $\times 4$ ) | Venue     | Set5<br>PSNR/SSIM | Set14<br>PSNR/SSIM | BSD100<br>PSNR/SSIM | Urban100<br>PSNR/SSIM | Manga109<br>PSNR/SSIM |
| SRCNN [2]             | ECCV14    | 30.48/0.8628      | 27.49/0.7503       | 26.90/0.7101        | 24.52/0.7221          | 27.66/0.8505          |
| VDSR [3]              | CVPR16    | 31.35/0.8838      | 28.01/0.7674       | 27.29/0.7251        | 25.18/0.7524          | 28.83/0.8870          |
| LapSNR [18]           | CVPR17    | 31.54/0.8850      | 28.19/0.7720       | 27.32/0.7280        | 25.21/0.7560          | 29.09/0.8845          |
| MemNet [4]            | ICCV17    | 31.74/0.8893      | 28.26/0.7723       | 27.40/0.7281        | 25.50/0.7630          | 29.42/0.8942          |
| EDSR [17]             | CVPRW17   | 32.09/0.8938      | 28.58/0.7813       | 27.57/0.7357        | 26.04/0.7849          | 30.35/0.9067          |
| SRMDNF [5]            | CVPR18    | 31.96/0.8925      | 28.35/0.7787       | 27.49/0.7337        | 25.68/0.7731          | 30.09/0.9024          |
| CARN [6]              | ECCV18    | 32.13/0.8937      | 28.60/0.7806       | 27.58/0.7349        | 26.07/0.7837          | 30.47/0.9084          |
| IMDN [8]              | MM19      | 32.21/0.8948      | 28.58/0.7811       | 27.56/0.7353        | 26.04/0.7838          | 30.45/0.9075          |
| SRFBN-S [7]           | CVPR19    | 31.98/0.8923      | 28.45/0.7779       | 27.44/0.7313        | 25.71/0.7719          | 29.91/0.9008          |
| RFDN-L [9]            | ECCV20    | 32.28/0.8957      | 28.61/0.7818       | 27.58/0.7363        | 26.20/0.7883          | 30.61/0.9096          |
| MAFFSRN [10]          | ECCV20    | 32.20/0.8953      | 26.62/0.7822       | 27.59/0.7370        | 26.16/0.7887          | -/-                   |
| LatticeNet [11]       | ECCV20    | 32.30/0.8962      | 28.68/0.7830       | 27.62/0.7367        | 26.25/0.7873          | -/-                   |
| LAPAR-A [12]          | NeurIPS20 | 32.15/0.8944      | 28.61/0.7818       | 27.61/0.7366        | 26.14/0.7871          | 30.42/0.9074          |
| RLFN [13]             | CVPRW22   | 32.24/0.8952      | 28.62/0.7813       | 27.60/0.7364        | 26.17/0.7877          | -/-                   |
| ESRT [14]             | CVPRW22   | 32.19/0.8947      | 28.69/0.7833       | 27.69/0.7379        | 26.39/0.7962          | 30.75/0.9100          |
| SwinIR-light [14]     | ICCVW21   | 32.44/0.8976      | 28.77/0.7858       | 27.69/0.7406        | 26.47/0.7980          | 30.92/0.9151          |
| NGswin [15]           | CVPR23    | 32.33/0.8963      | 28.78/0.7859       | 27.66/0.7396        | 26.45/0.7963          | 30.80/0.9128          |
| SwinIR-NG [15]        | CVPR23    | 32.44/0.8980      | 28.83/0.7870       | 27.73/0.7418        | 26.61/0.8010          | 31.09/0.9161          |
| DLGSA-I [16]          | ICCV23    | 32.54/0.8993      | 28.84/0.7871       | 27.73/0.7415        | 26.66/0.8033          | 31.13/0.9161          |
| UPS (Ours)            | —         | 32.50/0.9024      | 28.90/0.7892       | 27.79/0.7435        | 26.83/0.8073          | 31.39/0.9194          |
| SwinIR-S [14]         | ICCVW21   | 32.14/0.8955      | 28.67/0.7832       | 27.63/0.7382        | 26.22/0.7906          | 30.68/0.9111          |
| UPS-S (Ours)          | —         | 32.41/0.9008      | 28.80/0.7863       | 27.73/0.7414        | 26.58/0.7995          | 31.13/0.9163          |

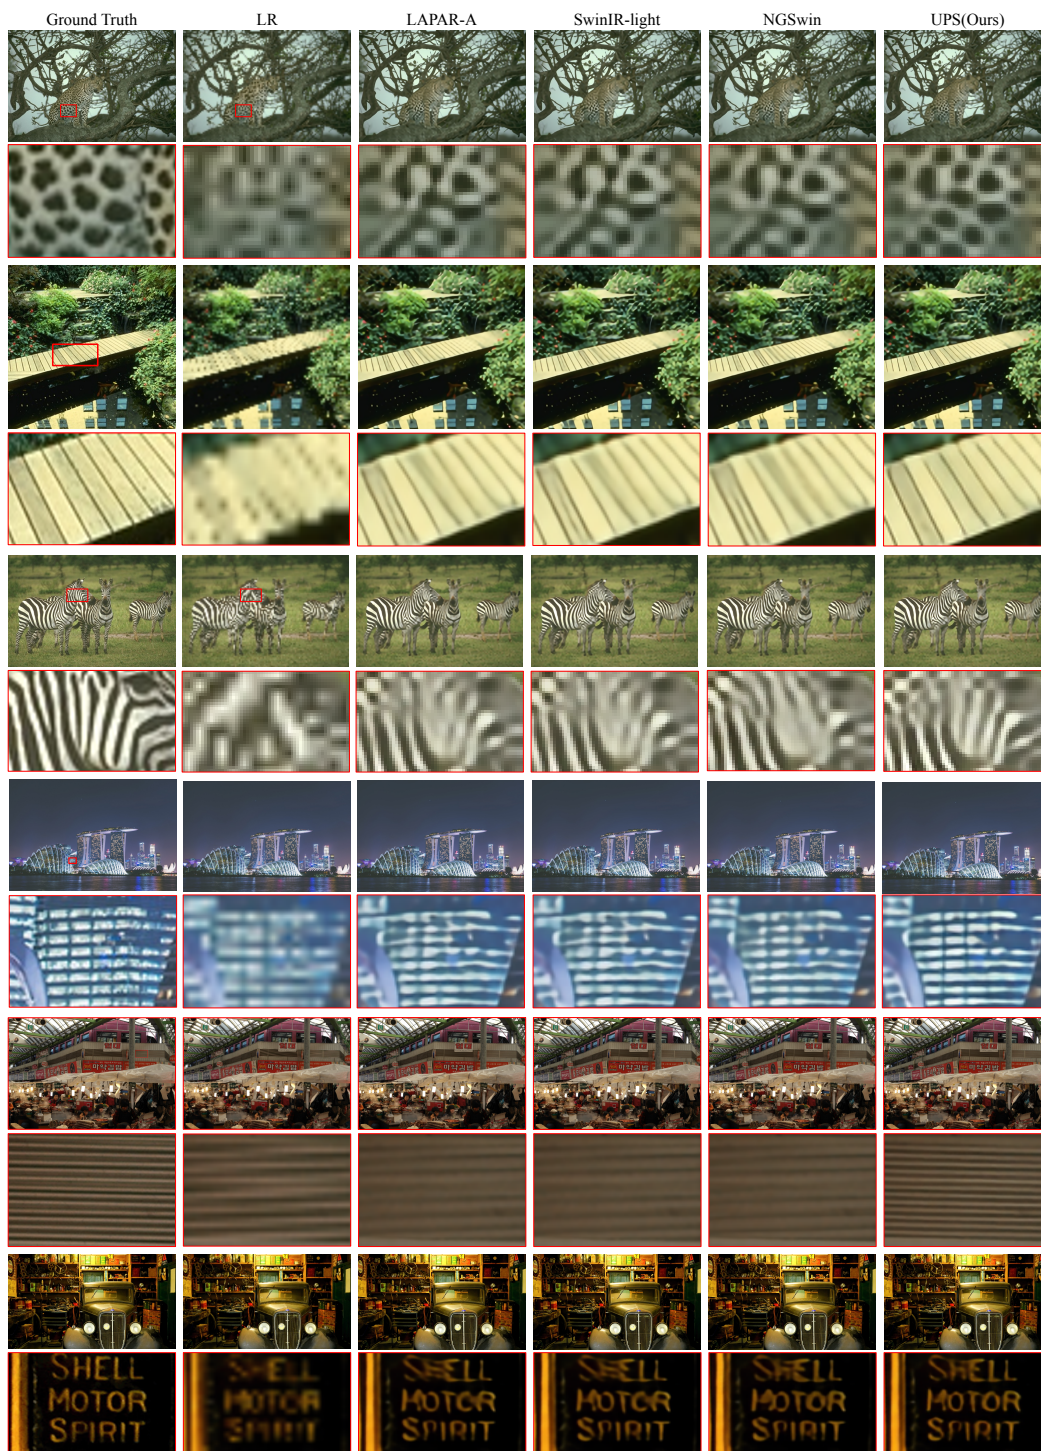

Figure 1: Qualitative evaluation on BSD100 [20] and DIV2K [21] dataset.



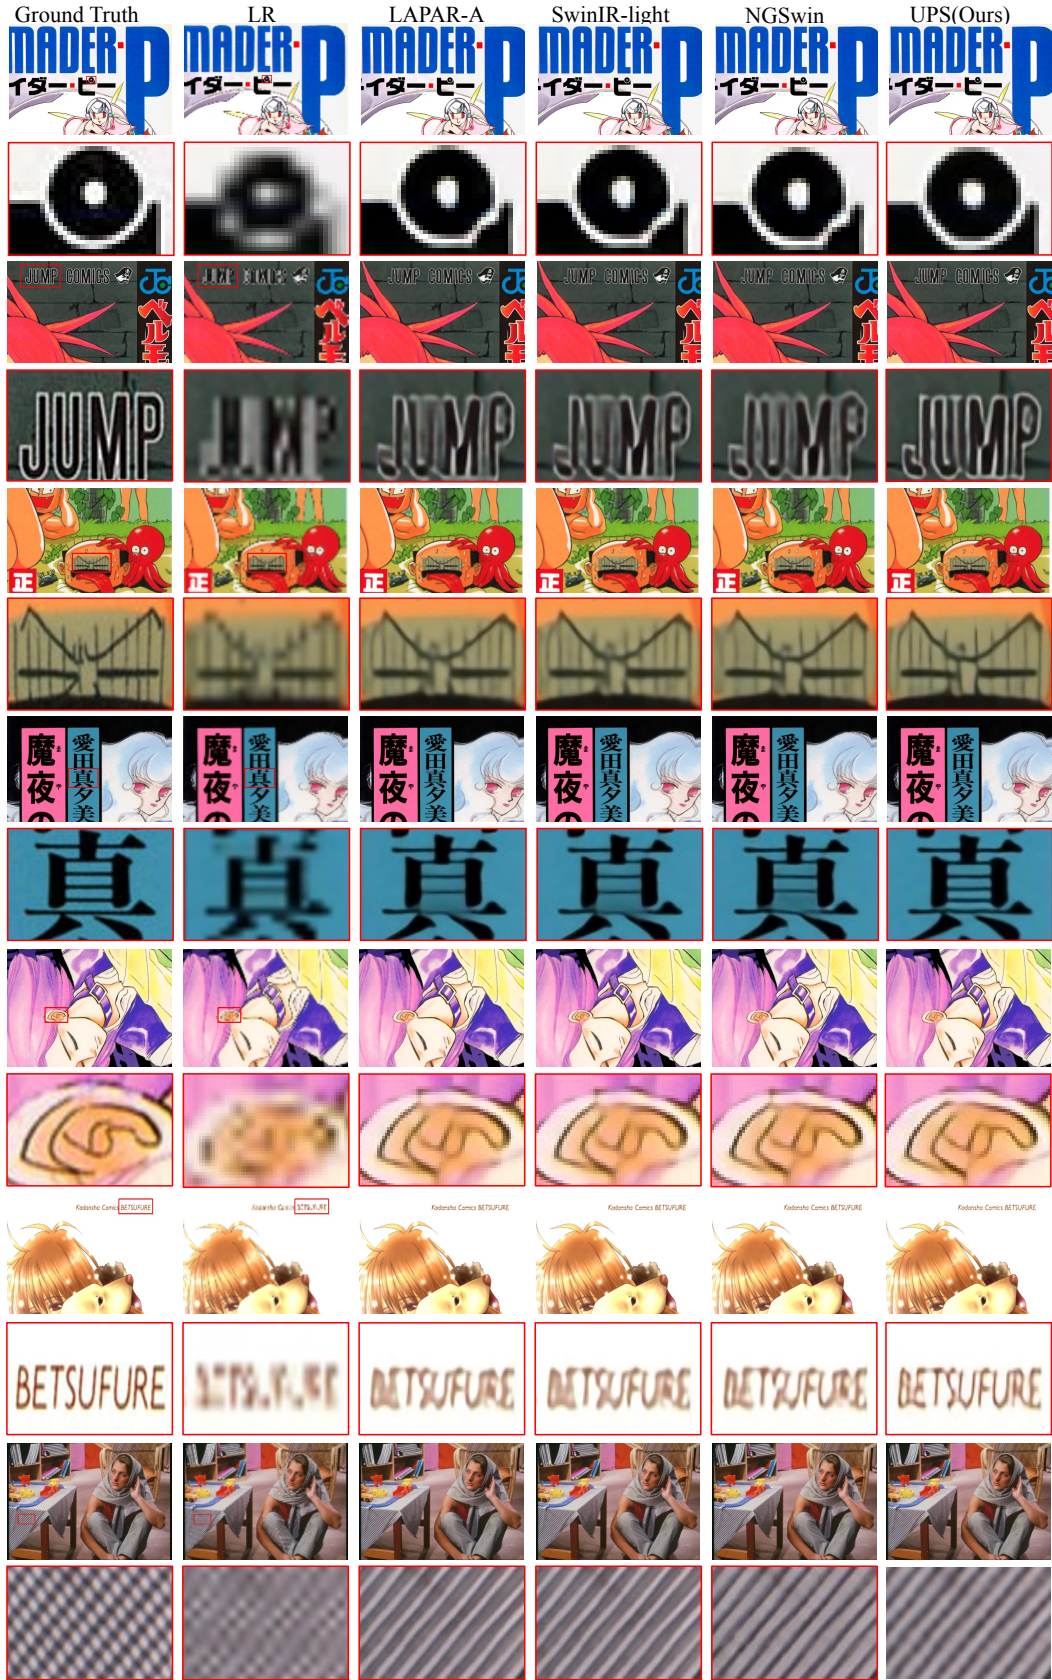

Figure 2: Qualitative evaluation on Manga109 [22] and Set14 [19] datasets.



## References

- [1] Jingyun Liang, Jiezhong Cao, Guolei Sun, Kai Zhang, Luc Van Gool, and Radu Timofte. Swinir: Image restoration using swin transformer. In *Proceedings of the IEEE/CVF international conference on computer vision*, pages 1833–1844, 2021.
- [2] Chao Dong, Chen Change Loy, Kaiming He, and Xiaoou Tang. Learning a deep convolutional network for image super-resolution. In *Computer Vision–ECCV 2014: 13th European Conference, Zurich, Switzerland, September 6–12, 2014, Proceedings, Part IV 13*, pages 184–199. Springer, 2014.
- [3] Jiwon Kim, Jung Kwon Lee, and Kyoung Mu Lee. Accurate image super-resolution using very deep convolutional networks. In *Proceedings of the IEEE conference on computer vision and pattern recognition*, pages 1646–1654, 2016.
- [4] Ying Tai, Jian Yang, Xiaoming Liu, and Chunyan Xu. Memnet: A persistent memory network for image restoration. In *Proceedings of the IEEE international conference on computer vision*, pages 4539–4547, 2017.
- [5] Kai Zhang, Wangmeng Zuo, and Lei Zhang. Learning a single convolutional super-resolution network for multiple degradations. In *Proceedings of the IEEE conference on computer vision and pattern recognition*, pages 3262–3271, 2018.
- [6] Namhyuk Ahn, Byungkong Kang, and Kyung-Ah Sohn. Fast, accurate, and lightweight super-resolution with cascading residual network. In *Proceedings of the European conference on computer vision (ECCV)*, pages 252–268, 2018.
- [7] Zhen Li, Jinglei Yang, Zheng Liu, Xiaomin Yang, Gwanggil Jeon, and Wei Wu. Feedback network for image super-resolution. In *Proceedings of the IEEE/CVF conference on computer vision and pattern recognition*, pages 3867–3876, 2019.
- [8] Zheng Hui, Xinbo Gao, Yunchu Yang, and Xiumei Wang. Lightweight image super-resolution with information multi-distillation network. In *Proceedings of the 27th acm international conference on multimedia*, pages 2024–2032, 2019.
- [9] Jie Liu, Jie Tang, and Gangshan Wu. Residual feature distillation network for lightweight image super-resolution. In *Computer Vision–ECCV 2020 Workshops: Glasgow, UK, August 23–28, 2020, Proceedings, Part III 16*, pages 41–55. Springer, 2020.
- [10] Abdul Muqeet, Jiwon Hwang, Subin Yang, JungHeum Kang, Yongwoo Kim, and Sung-Ho Bae. Multi-attention based ultra lightweight image super-resolution. In *Computer Vision–ECCV 2020 Workshops: Glasgow, UK, August 23–28, 2020, Proceedings, Part III 16*, pages 103–118. Springer, 2020.
- [11] Xiaotong Luo, Yuan Xie, Yulun Zhang, Yanyun Qu, Cuihua Li, and Yun Fu. Latticenet: Towards lightweight image super-resolution with lattice block. In *Computer Vision–ECCV 2020: 16th European Conference, Glasgow, UK, August 23–28, 2020, Proceedings, Part XXII 16*, pages 272–289. Springer, 2020.
- [12] Wenbo Li, Kun Zhou, Lu Qi, Nianjuan Jiang, Jiangbo Lu, and Jiaya Jia. Lapar: Linearly-assembled pixel-adaptive regression network for single image super-resolution and beyond. *Advances in Neural Information Processing Systems*, 33:20343–20355, 2020.
- [13] Fangyuan Kong, Mingxi Li, Songwei Liu, Ding Liu, Jingwen He, Yang Bai, Fangmin Chen, and Lean Fu. Residual local feature network for efficient super-resolution. In *Proceedings of the IEEE/CVF Conference on Computer Vision and Pattern Recognition*, pages 766–776, 2022.
- [14] Zhisheng Lu, Juncheng Li, Hong Liu, Chaoyan Huang, Linlin Zhang, and Tiejong Zeng. Transformer for single image super-resolution. In *Proceedings of the IEEE/CVF conference on computer vision and pattern recognition*, pages 457–466, 2022.
- [15] Haram Choi, Jeongmin Lee, and Jihoon Yang. N-gram in swin transformers for efficient lightweight image super-resolution. In *Proceedings of the IEEE/CVF Conference on Computer Vision and Pattern Recognition*, pages 2071–2081, 2023.

- 62 [16] Xiang Li, Jiangxin Dong, Jinhui Tang, and Jinshan Pan. Dlgsanet: Lightweight dynamic local  
63 and global self-attention networks for image super-resolution. In *Proceedings of the IEEE/CVF*  
64 *International Conference on Computer Vision*, pages 12792–12801, 2023.
- 65 [17] Bee Lim, Sanghyun Son, Heewon Kim, Seungjun Nah, and Kyoung Mu Lee. Enhanced deep  
66 residual networks for single image super-resolution. In *Proceedings of the IEEE conference on*  
67 *computer vision and pattern recognition workshops*, pages 136–144, 2017.
- 68 [18] Wei-Sheng Lai, Jia-Bin Huang, Narendra Ahuja, and Ming-Hsuan Yang. Deep laplacian  
69 pyramid networks for fast and accurate super-resolution. In *Proceedings of the IEEE conference*  
70 *on computer vision and pattern recognition*, pages 624–632, 2017.
- 71 [19] Roman Zeyde, Michael Elad, and Matan Protter. On single image scale-up using sparse-  
72 representations. In *Curves and Surfaces: 7th International Conference, Avignon, France, June*  
73 *24-30, 2010, Revised Selected Papers 7*, pages 711–730. Springer, 2012.
- 74 [20] David Martin, Charless Fowlkes, Doron Tal, and Jitendra Malik. A database of human seg-  
75 mented natural images and its application to evaluating segmentation algorithms and measuring  
76 ecological statistics. In *Proceedings Eighth IEEE International Conference on Computer Vision.*  
77 *ICCV 2001*, volume 2, pages 416–423. IEEE, 2001.
- 78 [21] Eirikur Agustsson and Radu Timofte. Ntire 2017 challenge on single image super-resolution:  
79 Dataset and study. In *Proceedings of the IEEE conference on computer vision and pattern*  
80 *recognition workshops*, pages 126–135, 2017.
- 81 [22] Yusuke Matsui, Kota Ito, Yuji Aramaki, Azuma Fujimoto, Toru Ogawa, Toshihiko Yamasaki,  
82 and Kiyoharu Aizawa. Sketch-based manga retrieval using manga109 dataset. *Multimedia*  
83 *Tools and Applications*, 76:21811–21838, 2017.
